# Supplementary material
Source: HighWire-hosted journal article supplement (https://www.ghspjournal.org/highwire/filestream/1578/field_highwire_adjunct_files/0/14-00228-Sullivan-Supplementary-material-KM-capacity-assessment-tool.xls)
Supplement: 14-00228-Sullivan-Supplementary-material-KM-capacity-assessment-tool.xls [file 14-00228-Sullivan-Supplementary-material-KM-capacity-assessment-tool.xls]

## Sheet: Sheet1
Capacity Assessment Tool (Post-assessment)		August-September, 2013
Step 1 Assessing BCC Capacity
Component 1: Situation Analysis
1.1.1.	Before organizing BCC programs, does the organization do the following: 1. Conduct a situational analysis gathering information from multiple perspectives 2. Consult key stakeholders outside the organization 3. Refers to information at the national, district & community levels 4. Consults health providers, community health workers, families, mothers, influentials, religious leaders etc.			Always-4; Sometimes-3; Rarely-2; Never-1
	How did the organization conduct a situation analysis during the last year? (Try to seek examples)
1.1.2	Does the organization use frameworks or models to conduct situation analysis or to design communication strategies?			Always-4; Sometimes-3; Rarely-2; Never-1
	What model or framework the organization is familier with? Which ones did they use for the situation analysis?
1.1.3	Does the organization use research data to design BCC programs?			Always-4; Sometimes-3; Rarely-2; Never-1
	What are the data sources that you use to design BCC programs?
1.1.4	Do you collaborate with other partners in BCC activity development to reduce duplication of services?			Always-4; Sometimes-3; Rarely-2; Never-1
	What are the mechanisms of colloboration?
Total of items 1.1.1-1.1.4		0
Component 2: The Communication Strategy
1.2.1	Has the organization developed a communication strategy that includes all of the following compnents: a. Final audience segmentation b. Barriers (by audience) c. Enablers d. Desired changes/Key behaviors (by audience) e. Communication objectives (by audience) f. Strategic approach g. Positioning statement h. Messages i. Channels (by audience) j. Activities and materials			Always-4; Sometimes-3; Rarely-2; Never-1
	Of the above 10 components, which do you use: _________ (number) And list the components you regularly use
	What components are covered in the organization's most recent strategy? (Try to collect the strategy)
1.2.2	Does your organization prepare audience specific messages?			Always-4; Sometimes-3; Rarely-2; Never-1
	Please give an example of an audience specific message
	Why is it important to develop audience-specific messages and BCC programs?
1.2.3	Do BCC Programs set SMART communication objectives that address barriers to and enablers of change for each audience? (SMART = Specific, Measureable, Attainable, Reliable and Time-bound)			Always-4; Sometimes-3; Rarely-2; Never-1
	In a recent BCC campaign/program, what was the behavioral barrier to institutional delivery in the community? What were the enablers that the organization utilized to change behavior?
Total of items 1.2.1-1.2.3		0
Component 3: Materials Development
1.3.1	Does your organization develop original materials, if yes, do you use the following key elements of materials development to make sure they fit the needs of the program?			Always-4; Sometimes-3; Rarely-2; Never-1
1.3.1.1	Do you have an Inventory of BCC material?			Very good inventory-4; Moderately documented-3; Not so well-documented-2; No inventory maintained-1
	How do you use the inventory?
1.3.1.2	Does your organization develop creative briefs before drafting the messages?			Always-4; Sometimes-3; Rarely-2; Never-1
	Why is a creative brief necessary?
1.3.1.3	Does your organization involve the target audience in materials development ?			Always-4; Sometimes-3; Rarely-2; Never-1
	How can you ensure audience participation in material development?
1.3.1.5	Does your organization arrange stakeholders'/technical review of materials before finalization?			Always-4; Sometimes-3; Rarely-2; Never-1
1.3.1.6	Does your organization pre-test draft materials before finalization?			Always-4; Sometimes-3; Rarely-2; Never-1
	Why do you pretest materials?
1.3.2	If your program is using materials from other organizations, do you have a formal review by technical staff and stakeholders to ensure information is correct and relevant?			Always-4; Sometimes-3; Rarely-2; Never-1
	Who reviews the materials for technical accuracy?
1.3.3	Does you organization follow 7Cs for developing effective message? 7Cs are command attention, clarify message, communicate benefits, cater to heart and head, create trust, call to action and consistency			Always-4; Sometimes-3; Rarely-2; Never-1
	If yes, please give some examples. If you are not using 7Cs, how do you ensure developing effective message?
Total of items 1.3.1-1.3.4		0
Component 4: Implementation, Management, and Leadership in SBCC
Sub-component 1: Work plan development
1.4.1	Does the organization develop work plans for BCC programs with the following components: assigns duties to staff, sets time frames, allocates resources, and link materials and activities to communication objectives?			Always-4; Sometimes-3; Rarely-2; Never-1
	What components were covered in a recent (within the past year) work plan?
1.4.2	Coordination Does your organization have a specific strategy to coordinate with others (e.g., referral for products and services).			Strong coordination-4; moderate coordination-3; weak coordination-2; no coordination-1
	What efforts have you made toward coordination with others?
1.4.3	Does your program include a budget for BCC from the beginning?			Always-4; Sometimes-3; Rarely-2; Never-1
Sub-component 2: Staffing plans and competencies
1.4.4	Does your management staff have the skills to manage and implement BCC progams? a. strategic communication b. IPC/C c. BCC/KM d. BCC planning			Almost all-4; Majority-3; Limited to a few-2; Not at all-1
	What types of training have management staff had on how to manage and implement BCC programs?
1.4.5	Do the technical staff have the capacity and skills to develop and implement BCC programs? (IPC/C, BCC/KM, Basic BCC training)			Almost all-4; Majority-3; Limited to a few-2; Not at all-1
1.4.6	Does the organization have a plan for strengthening staff’s BCC capacity? (basic BCC training, on-the-job training, etc.)			Has planned-4; Will plan-3; Has considered planning-2; no plan at all 1
	What kind of BCC training are you planning?
Sub-component 3: Supervision of field workers
1.4.7	Is there any plan to make regular visits to field staff and volunteers to observe strengths and/or identify areas needing support?			Regularly-4; Moderately regular-3; Irregular-2; No visits-1
	What kind of monitoring tool(s) do you use for these visits?
1.4.8	Does your organization have a system in place to provide communication materials for outreach at the field level?			Strong system-4; Moderately strong-3; Occassional system-2; No system-1
Total of items 1.4.1-1.4.8
Component 5: Monitoring, Evaluation, and Re-planning of SBCC Programs
Sub-component 1: Frameworks and mechanisms for measurement
1.5.1	Does the organization has a specific set of M&E indicators that measure behavior, and are they linked to communication objectives?			Specific indicator-4; Some indicator but not specific-3; Very few indicators-2; No indicators 1
	Could you please name few indicators that are linked to communication objectives?
1.5.2	Does the organization has a specific set of M&E indicators that measure process, and are they linked to communication objectives?			Specific indicator-4; Some indicator but not specific-3; Very few indicators-2; No indicators 1
1.5.3	Does the program use standardized tools and systems to collect and analyze M&E data for BCC programs?			Always-4; Sometimes-3; Rarely-2; Never-1
	What do you do with the data?
	Could you please name a few M&E indicators that are linked to BCC Programs?
Sub-component 2: Use of results for re-planning
1.5.4	Does your organization document and disseminate BCC programs' results, lessons learned, and best practices?			Always-4; Sometimes-3; Rarely-2; Never-1
	When is the last time you shared the results? Who did you share the result with?
1.5.6	Does the organization use M&E data to assess program progress, and to improve current BCC programs?			Always-4; Sometimes-3; Rarely-2; Never-1
Total of items 1.5.1-1.5.6
STEP 2: ASSESSING KM CAPACITY
Component 1: The KM Process
2.1.1	Is the organization familiar with the concepts of knowledge management and knowledge sharing and exchange?			Very familiar-4; Moderately familiar-3; Little familiar-2; Not at all-1
2.1.2	Does the organization understand that knowledge, information, and data are useful in developing effective programs and activities?			Highly understands-4; Moderately understands-3; Little understanding-2; Not at all-1
2.1.3	Does the organization have a system in place to identify Knowledge gaps?			Strong system-4; Moderate system-3; Weak system-2; No system-1
	How to you identify the knowledge gaps?
2.1.4	Does the organization have a system in place to fill identified knowledge gaps?			Strong system-4; Moderate system-3; Weak system-2; No system-1
	How to you fill in the knowledge gaps?
2.1.5	Does the organization has a process for gathering knowledge, information and data to inform activities?			Strong process 4; Moderate process-3; Weak process-2; No process-1
	What is the process of gathering knowledge, information and data to inform activities?
2.1.6	Does the organization have a system for identifying and sharing “tacit” knowledge (what employees know how to do, but cannot express) among others within the organization?			Strong system-4; Moderate system-3; Weak system-2; No system-1
	What are the mechanisms of identifying and sharing tacit knowledge?
2.1.7	Does the organization have a set of program design and production standards in place, based on knowledge, information and data?			Strong standard-4; Moderate standard-3; Weak standard-2; No standard-1
	Can you give an example?
Total of items 2.1.1-2.1.7		0
Component 2: Management and Leadership in KM
2.2.1	Does the organization recognize the public health contribution of its knowledge resources, and develop strategies to disseminate and promote these resources and lessons learned, especially to other government units or organizations working in the same field?			Strongly recognize-4; Moderately recognize-3; Weakly recognize-2; Not at all recognize-1
2.2.2	Does the organization’s operational strategy include managing knowledge, information, and data?			Includes strongly-4; Includes moderately-3; Includes weakly-2; Not at all-1
2.2.3	Does the organization use learning to strengthen existing skills and build new skills among staff?			Uses strongly-4; Uses moderately-3; Uses weakly-2; Not at all-1
	How does the organization use the learning?
Total of items 2.2.1-2.2.3
Component 3: KM Culture
2.3.1	Does the organization provide forums for internal knowledge sharing and exchange among staff (at the national and local level)?			Strong forum-4; Moderate forum-3; Weak forum-2; Not at all-1
	What types of forums exist for internal knowledge sharing and exchange among staff?
2.3.2	Does the organization provides forums for external knowledge sharing and exchange among stakeholders (at the national and local level)?			Strong forum-4; Moderate forum-3; Weak forum-2; Not at all-1
	What types of forums exist for external knowledge sharing and exchange among staff?
2.3.3	Do the staff members at the national/HQ level know the objectives of the organization, current status of those objectives, and activities that will lead to the achievement of objectives?			Very familiar-4; Moderately familiar-3; Little familiar-2; Not at all-1
2.3.4	Do the staff members at the local level know the objectives of the organization, current status of those objectives, and activities that will lead to the achievement of those objectives?			Very familiar-4; Moderately familiar-3; Little familiar-2; Not at all-1
2.3.5	Are the ideas shared among organizational staff, and is the organization proactive in implementing new ideas?			Always-4; Sometimes-3; Rarely-2; Never-1
	What is the latest idea that is being implemented at this point? Who generated the idea?
2.3.6	Do the employees take responsibility for their own learning?			Always-4; Sometimes-3; Rarely-2; Never-1
	Do you acknowledge their learning? How?
2.3.7	Are innovations and technology seen as tools to manage knowledge, information and data; and facilitate sharing and exchange by most staff members?			Always-4; Sometimes-3; Rarely-2; Never-1
	Is there any innovative idea introduced recently?
2.3.8	Is there a strategy to deliver BCC programs through digital platforms as appropriate?			Strong strategy-4; Moderate strategy-3; Sporedically done-2; Never done-1
	What kind of platforms are used?
Total of items 2.3.1-2.3.8		0
Component 4: Monitoring, Evaluation, and Re-planning of KM Programs
Sub-component 1: Frameworks and mechanisms for measurement
2.4.1	Does the organization have a specific set of M&E indicators linked to KM objectives?			Strong indicators-4; Moderate indicatros-3; Weak indicators-2; No indicators-1
2.4.2	Does the program use standardized tools and systems to collect and analyze M&E data for KM programs?			Always-4; Sometimes-3; Rarely-2; Never-1
Sub-component 2: Use of results for re-planning
2.4.3	Do KM programs document and disseminate results, lessons learned, and best practices?			Always-4; Sometimes-3; Rarely-2; Never-1
2.4.4	Do KM programs analyze data generated by M&E and share it with implementers of SBCC programs?			Always-4; Sometimes-3; Rarely-2; Never-1
2.4.5	Are M&E data used to assess program progress, and to improve current KM programs?			Always-4; Sometimes-3; Rarely-2; Never-1
Total of items 2.4.1-2.4.5		0
